# Supplementary material for: Novel Mutation in the Feline NPC2 Gene in Cats with Niemann–Pick Disease
Source: MDPI journal article supplement (doi:10.3390/ani13111744), 2023-05-24
Supplement: s1 [file s1]

**Table S1.** Primers used to amplify exons and splicing regions of the feline *NPC1* gene.

| Exon no. | Name        | Primer sequence (5'→3')   | Length (mer) | GC (%) | T <sub>m</sub> (°C) | Amplicon (bp) | T <sub>a</sub> (°C) |
|----------|-------------|---------------------------|--------------|--------|---------------------|---------------|---------------------|
| 1        | fNPC1-E1-F  | AACCGCACCAAGGCAGCATG      | 20           | 60     | 57.7                | 133           | 56                  |
|          | fNPC1-E1-R  | TAGCCTCCCGGCCCTCCTC       | 19           | 74     | 57.9                |               |                     |
|          | fNPC1-E1-F1 | GCCTAGTCAAGTCGAGTCTCG     | 21           | 57     | 56.3                |               |                     |
| 2        | fNPC1-E2-F  | GGCCCCGATGAAACTGAG        | 18           | 60     | 58.4                | 193           | 59                  |
|          | fNPC1-E2-R  | GTTCCCAGCGCCCAAGATAAC     | 21           | 57     | 63.2                |               |                     |
|          | fNPC1-E3-F  | GAGTAATGTGTGTCCTGATTTGAC  | 24           | 42     | 62                  |               |                     |
| 3        | fNPC1-F3-R  | AACTGTAGAGGCAGTGCAAGG     | 21           | 52     | 61.2                | 162           | 60                  |
|          | fNPC1-E3-F2 | CTCTGTCCAGGATTCTTCTTTG    | 22           | 45     | 60.1                | 92            | 59                  |
|          | fNPC1-E3-R2 | TGTAGAGGCAGCTGCAGGT       | 19           | 58     | 59.5                |               |                     |
|          | fNPC1-E3-F3 | GAGTAATGTGTGTCCTGATTTG    | 22           | 41     | 58.4                | 175           | 55                  |
|          | fNPC1-E3-R3 | ACTGTAGAGGCAGTGCA         | 17           | 53     | 52.4                |               |                     |
|          | fNPC1-E4-F1 | GCTGGCCCTATTATCTGTGA      | 20           | 50     | 58.4                | 165           | 58                  |
| 4        | fNPC1-E4-R1 | GTAACAGGATCAACATAATCTTCAG | 25           | 36     | 60.9                |               |                     |
|          | fNPC1-E4-F2 | GGCAAAGTCAGTTTCTGAATG     | 21           | 43     | 57.5                | 166           | 57                  |
|          | fNPC1-E4-R2 | TAAAAGCTTATTCACCCTCACC    | 22           | 41     | 58.4                |               |                     |
| 5        | fNPC1-E5-F  | TTGCCTTCTTCCTCTGCCAG      | 20           | 55     | 60                  | 133           | 60                  |
|          | fNPC1-E5-R1 | GTACTCAATCCAGTTAGTGGCA    | 22           | 55     | 60                  |               |                     |
|          | fNPC1-E5-F1 | ATGACAAAGCCCTGGGACTG      | 20           | 55     | 60                  | 150           | 58                  |
|          | fNPC1-F5-R2 | AATACACCAAACCTGGGAGTC     | 21           | 43     | 57.5                |               |                     |
| 6        | fNPC1-E6-F  | ATTTACTCAACCCCATCCTCCC    | 22           | 50     | 62                  | 185           | 59                  |
|          | fNPC1-E6-R  | TGCTCACCTGTAGCACCAC       | 19           | 58     | 59.5                |               |                     |
|          | fNPC1-E6-F1 | TCAATTGTTTGTGGCCCAAAGC    | 22           | 45     | 60                  | 183           | 60                  |
|          | fNPC1-E6-R1 | CAAGATTCTCCAGGGCACAG      | 20           | 55     | 60                  |               |                     |
|          | fNPC1-E6-F2 | TGTCAGTGTGCTTAGCACTAG     | 21           | 48     | 59.5                | 282           | 57                  |
|          | fNPC1-E6-R2 | CTTGCCCTGGGGAATAAAC       | 19           | 53     | 57.5                |               |                     |
| 7        | fNPC1-E7-F  | GGTCTATGGGACTATCAGAGGAAC  | 24           | 50     | 65                  | 168           | 60                  |

|    |              |                          |    |    |      |     |    |
|----|--------------|--------------------------|----|----|------|-----|----|
| 8  | fNPC1-E7-R   | CAAAAGTGCCTACCTCTGTCATTG | 24 | 46 | 60   | 152 | 59 |
|    | fNPC1-E8-F1  | GACTTTCAGGAATGGCTTGGC    | 21 | 50 | 61   |     |    |
|    | fNPC1-E8-R1  | GTTTCGGACGCAGAAAGAGC     | 20 | 55 | 60   |     |    |
|    | fNPC1-E8-F2  | GCATTTGAGGGCTGTCTGAG     | 20 | 55 | 60   | 124 | 60 |
|    | fNPC1-E8-R2  | CAAACACCAGGCCTGAAGAAC    | 21 | 52 | 61   |     |    |
|    | fNPC1-E8-F3  | GTGTTTGTGCGGGTCACGA      | 19 | 58 | 60   | 131 | 59 |
|    | fNPC1-E8-R3  | GCCTGGATGATGAGCTGCT      | 19 | 58 | 60   |     |    |
|    | fNPC1-E8-F4  | GCACTTTGGGCCTTTCTTCC     | 20 | 55 | 60   | 144 | 59 |
|    | fNPC1-E8-R4  | ACGTTACCTGGTGCAAGATC     | 20 | 50 | 58   |     |    |
|    | fNPC1-E8-F5  | TTCTTCTCCCTGGCCTTCATTG   | 22 | 50 | 62.1 | 173 | 60 |
|    | fNPC1-E8-R5  | GGCTTCCCAGAACGGATTTC     | 20 | 55 | 60.5 |     |    |
|    | fNPC1-E8-F6  | GTAGCTAACGCTTTCCCTGT     | 20 | 50 | 58.4 |     |    |
| 9  | fNPC1-E9-F1  | ATCCAATGTGTTTCTGGGTTTG   | 22 | 41 | 58   | 131 | 58 |
|    | fNPC1-E9-R1  | GGGCCACGCAGATGTCTTG      | 19 | 63 | 62   |     |    |
|    | fNPC1-E9-F2  | CTGCCATCGAAAATATCACTGC   | 22 | 45 | 60   | 142 | 60 |
|    | fNPC1-E9-R2  | AGCATGGAATGGCTGTTCTG     | 22 | 45 | 60   |     |    |
|    | fNPC1-E9-F3  | CTGCACCATTTCTGAGCGTG     | 19 | 58 | 60   | 157 | 58 |
|    | fNPC1-E9-R3  | CTGGTGGGCCGAATGATG       | 18 | 61 | 58   |     |    |
| 10 | fNPC1-E10-F  | GCTTGTTGTAACTGGGAGTTG    | 21 | 48 | 60   | 99  | 59 |
|    | fNPC1-E10-R  | CACCTGTTAGTGACAGAACCA    | 21 | 48 | 60   |     |    |
|    | fNPC1-E10-F1 | CGATACCAGTTTGCTCCATG     | 20 | 50 | 58.4 | 149 | 58 |
|    | fNPC1-E10-R1 | ACCGAATGTACCCAGGCAAG     | 20 | 55 | 60.5 |     |    |
| 11 | fNPC1-E11-F1 | CAATAATGCCACAGCCCTTG     | 20 | 50 | 58.4 | 117 | 58 |
|    | fNPC1-E11-R  | CACACAACAAAGACAGCAACTC   | 22 | 45 | 60   |     |    |
|    | fNPC1-E11-F2 | CTGCACACTTCTTATCTTCT     | 20 | 40 | 54.3 | 124 | 57 |
|    | fNPC1-E11-R1 | CTGGAGCCTCTCTGTATCAT     | 20 | 50 | 58.4 |     |    |
| 12 | fNPC1-E12-F1 | GTCTCACTTAGCTGTCACTAAG   | 22 | 45 | 58   | 159 | 57 |
|    | fNPC1-E12-R1 | CACCGTTACTTTCACGATTAG    | 22 | 41 | 58   |     |    |
|    | fNPC1-E12-F2 | ACTGAGCGAAGTATTGAAGATG   | 22 | 41 | 58   | 167 | 58 |

|    |              |                         |    |      |      |     |    |
|----|--------------|-------------------------|----|------|------|-----|----|
| 13 | fNPC1-E12-R2 | CCAGCACAGACACACACACA    | 20 | 55   | 60   | 155 | 58 |
|    | fNPC1-E13-F1 | GGACAAATGATACGCTGACAG   | 21 | 48   | 59.5 |     |    |
|    | fNPC1-E13-R1 | CAATGAGGGTGAGGGGGAT     | 20 | 50   | 59.5 |     |    |
|    | fNPC1-E13-F2 | TGCTCGTTGGGCATCTTTAG    | 19 | 58   | 59.5 |     |    |
|    | fNPC1-E13-R2 | TGGTCAGATGCCCAGCTCT     | 19 | 58   | 59.5 |     |    |
| 14 | fNPC1-E14-F1 | GAAGCAAAGAGATGGCATCG    | 20 | 50   | 58.4 | 131 | 57 |
|    | fNPC1-E14-R1 | CACTTCTCCTAGGACCCT      | 18 | 56   | 56.3 |     |    |
|    | fNPC1-E14-F2 | AACTCTGGATCAGCAGCTG     | 19 | 53   | 57.5 |     |    |
|    | fNPC1-E14-R2 | CCAGGCTTAGAAAAGTGTAGG   | 21 | 48   | 59.5 |     |    |
|    | fNPC1-E14-F3 | CGAGATGAACGTCTTCATGG    | 20 | 50   | 58.4 |     |    |
| 15 | fNPC1-E15-F1 | CAGAGTCCTGTGCTGCAG      | 18 | 61   | 58.4 | 127 | 58 |
|    | fNPC1-E15-R1 | AGAAGGAAGTCGATGAGGAC    | 20 | 55   | 58.4 |     |    |
|    | fNPC1-E15-F2 | CTCTCTGTTTGCCGGGAT      | 18 | 56   | 56.3 |     |    |
|    | fNPC1-E15-R2 | GACTCTAATTAGGAGACTGTG   | 21 | 43   | 57.5 |     |    |
|    | fNPC1-E16-F  | GTCTAGAATCTGACTGAAGCAG  | 22 | 45   | 60.1 |     |    |
| 16 | fNPC1-E16-R1 | CCGAAACAAGCAGCTCTCTG    | 22 | 45   | 60.5 | 144 | 59 |
|    | fNPC1-E16-F1 | GAAGATGGAACCAGTGTCCAG   | 21 | 54.4 | 61.2 |     |    |
|    | fNPC1-E16-R  | CTTAGAATGCATGGGACAGATC  | 22 | 45   | 60.1 |     |    |
|    | fNPC1-E17-F  | GCAATCACTGTCTTATAACTCAC | 23 | 39   | 59.2 |     |    |
|    | fNPC1-E17-R1 | GAAAGAGACTGATCCAATCCG   | 21 | 48   | 59.5 |     |    |
| 17 | fNPC1-E17-F1 | GTCATTCAGTGTTGCAGTCC    | 20 | 50   | 58.4 | 114 | 58 |
|    | fNPC1-E17-R  | TTTGTTACACCACTGGCTCA    | 21 | 48   | 59.5 |     |    |
|    | fNPC1-E18-F1 | CGCCTTGCTTAGTTACTATCAG  | 22 | 45   | 61.1 |     |    |
|    | fNPC1-E18-R1 | CCGCACACCATGTTCTGC      | 18 | 45   | 60.1 |     |    |
|    | fNPC1-E18-F2 | TTTGTCCTGGAGGAAGGGCA    | 20 | 55   | 60.5 |     |    |
| 18 | fNPC1-E18-R2 | GCTTCTGAAGTACAAGACAAGG  | 22 | 45   | 60.1 | 103 | 59 |
|    | fNPC1-E18-F3 | G TTCACACTCTCTCCTATTCTT | 22 | 41   | 60.5 |     |    |
|    | fNPC1-E18-R3 | CCTTTCAGAGAGGTGTAGTC    | 20 | 50   | 58.4 |     |    |
|    | fNPC1-E18-F4 | ACTCCTACGTGATGGATTATTC  | 23 | 39   | 59.2 |     |    |

|    |              |                         |    |    |      |     |    |
|----|--------------|-------------------------|----|----|------|-----|----|
| 19 | fNPC1-E19-F  | AGACTTCCTGCCTGTGGAG     | 19 | 58 | 59.5 | 130 | 58 |
|    | fNPC1-E19-R1 | CTACAGCAAGAAGACTGAGG    | 20 | 50 | 58.4 |     |    |
|    | fNPC1-E19-F1 | CGACGATTACTTTGATTGGGTC  | 22 | 45 | 60.1 | 133 | 59 |
|    | fNPC1-E19-R  | CAAAAGTCTTCAGAGAAAAGGG  | 22 | 41 | 58.4 |     |    |
| 20 | fNPC1-E20-F  | CTGGAGACTAATCTTCTGACC   | 21 | 48 | 58.3 | 143 | 58 |
|    | fNPC1-E20-R1 | GCAAACAGAGGCCTCAAGGT    | 21 | 48 | 59.5 |     |    |
|    | fNPC1-E20-F1 | GCAAACAGAGGCCTCAAGGT    | 20 | 55 | 60.5 | 123 | 59 |
|    | fNPC1-E20-R  | GAGGCAGGCACGTATCTGA     | 19 | 58 | 59.5 |     |    |
| 21 | fNPC1-E21-F1 | TCTGCAGATCCTGTTCTGAC    | 20 | 50 | 58.4 | 163 | 58 |
|    | fNPC1-E21-R1 | CTCATGGCGTCAGTAAAGTC    | 20 | 50 | 58.4 |     |    |
|    | fNPC1-E21-F2 | CACACCGTGCTTCAGACGT     | 19 | 58 | 59.5 | 171 | 58 |
|    | fNPC1-E21-R2 | GGGTGTGGGCTCTAACCTA     | 19 | 58 | 59.5 |     |    |
| 22 | fNPC1-E22-F1 | GCGAGAATGAGCTGTGACAG    | 20 | 55 | 60.5 | 178 | 59 |
|    | fNPC1-E22-R1 | CATGATCACTGCAGACCACA    | 20 | 50 | 58.4 |     |    |
|    | fNPC1-E22-F2 | CGTGATTCTCCTGGGCTGT     | 20 | 50 | 59.5 | 177 | 58 |
|    | fNPC1-E22-R2 | GGACACAGGAGTTATGCACTG   | 21 | 52 | 61.2 |     |    |
| 23 | fNPC1-E23-F  | AAGGATGTAACGGAAGCACTT   | 21 | 43 | 57.5 | 188 | 56 |
|    | fNPC1-E23-R  | ACGAGCTGGGCACTTTATG     | 19 | 53 | 57.5 |     |    |
| 24 | fNPC1-E24-F1 | GAGTAGGTTGGTAAGTGCTTTC  | 22 | 45 | 60.1 | 164 | 57 |
|    | fNPC1-E24-R1 | TGGGTGGCTCCCAGTAAGA     | 19 | 58 | 59.5 |     |    |
|    | fNPC1-E24-F2 | CTTCAGGATGTATTTGGCTATG  | 22 | 41 | 58.4 | 141 | 58 |
|    | fNPC1-E24-R2 | GATCTTTCTTCTCCTTTAGTAGC | 23 | 39 | 59.2 |     |    |
| 25 | fNPC1-E25-F  | GAACTACCCTGTGCGCCTTC    | 19 | 58 | 59.5 | 180 | 58 |
|    | fNPC1-E25-R  | TTCAGAGTCCCCCGACCT      | 18 | 61 | 58.4 |     |    |

T<sub>m</sub>: Melting temperature (salt adjusted), T<sub>a</sub>: Annealing temperature used.

**Table S2.** Primers used to amplify exons and splicing regions of the feline *NPC2* gene.

| Exon no. | Name         | Primer sequence (5'→3') | Length (mer) | GC (%) | T <sub>m</sub> (°C) | Amplicon (bp) | T <sub>a</sub> (°C) |
|----------|--------------|-------------------------|--------------|--------|---------------------|---------------|---------------------|
| 1        | fNPC2-E1-F   | AGGCGGTCGCTTCTTCCT      | 18           | 61     | 58.4                | 141           | 58                  |
|          | fNPC2-E1_R   | GCTCCGGCTCACCGCA        | 16           | 75     | 58.4                |               |                     |
|          | fNPC2-E1-F2  | TCTTGTGACTGAGGCGGTC     | 19           | 58     | 59.5                |               |                     |
| 2        | fNPC2-E2-F   | CAGGTGGTTTATCTTGCCCTC   | 20           | 50     | 58.4                | 192           | 58                  |
|          | fNPC2-E2-R   | TGAATTTGAAGTCAAGAGCCAC  | 22           | 41     | 58.4                |               |                     |
|          | fNPC2-E3a-F  | GCTGGCCCTGTCACTATC      | 18           | 61     | 58.4                | 137           | 58                  |
| 3        | fNPC2-E3a-R  | CACTCTTACAACCATCAGCC    | 20           | 50     | 58.4                |               |                     |
|          | fNPC2-E3a-F2 | CTGTCACTATCTCATTCTCTTTC | 23           | 39     | 59.2                |               |                     |
|          | fNPC2-E3b-F  | GATGGGCGTAGCAGTTCC      | 18           | 61     | 58.4                | 170           | 59                  |
|          | fNPC2-E3b-R  | TCACAAGGCTACCAGTGTC     | 19           | 53     | 57.5                |               |                     |
|          | fNPC2-E3b-F2 | GGCATCCTGATGGGCGT       | 17           | 61     | 57.3                |               |                     |
|          | fNPC2-E3b-R2 | ACCAGTGTCCTGAACAACG     | 19           | 53     | 57.5                | 133           | 56                  |
|          | fNPC2-E3b-F3 | GCTTTGGTGTATGGCATCCT    | 20           | 50     | 58.4                |               |                     |
| 4        | fNPC2-E4-F   | ACCGGTTCTGGATTGAGGT     | 19           | 53     | 57.5                | 158           | 58                  |
|          | fNPC2-E4-R   | AGCACCTCTAGCCTTCAATC    | 20           | 50     | 58.4                |               |                     |
|          | fNPC2-E4-F1  | GTCTGAGGAGTTAGGCAGTT    | 20           | 50     | 58.4                |               |                     |

T<sub>m</sub>: Melting temperature (salt adjusted), T<sub>a</sub>: Annealing temperature used

**Table S3.** Primers used to amplify exons and splicing regions of the feline *SMPD1* gene.

| Exon no. | Name        | Primer sequence (5'→3') | Length (mer) | GC (%) | T <sub>m</sub> (°C) | Amplicon (bp) | T <sub>a</sub> (°C) |
|----------|-------------|-------------------------|--------------|--------|---------------------|---------------|---------------------|
| 2        | fSMPD1-E2-F | GAGCACACCTGTCAATGGCT    | 20           | 55     | 60.5                | 148           | 58                  |
|          | fSMPD1-E2-R | GGTTTCCATGGACCTCAACTA   | 21           | 48     | 59.5                |               |                     |

T<sub>m</sub>: Melting temperature (salt adjusted), T<sub>a</sub>: Annealing temperature used.
